# Supplementary material
Source: PubMed Central journal article supplement (PMC4113340)
Supplement: NIHMS584359-supplement-03.pdf [file NIHMS584359-supplement-03.pdf]

|    |                                                                  |
|----|------------------------------------------------------------------|
| 1  | glomerular filtration rate.af. or glomerular filtration rate.tw. |
| 2  | gfr.af.                                                          |
| 3  | exp Glomerular Filtration Rate/                                  |
| 4  | exp Kidney Function Tests/                                       |
| 5  | serum creatin*.af. or serum creatin*.tw.                         |
| 6  | serum cysta\$.af. or serum cysta\$.tw.                           |
| 7  | 5 not 6                                                          |
| 8  | 1 or 2 or 3 or 4 or 7                                            |
| 9  | predict\$.af.                                                    |
| 10 | formula.af.                                                      |
| 11 | development.af.                                                  |
| 12 | equation.af.                                                     |
| 13 | 9 or 10 or 11 or 12                                              |
| 14 | 7 and 13                                                         |
| 15 | limit 14 to humans                                               |
| 16 | exp Adult/                                                       |
| 17 | 15 and 16                                                        |
