# Supplementary material
Source: PubMed Central journal article supplement (PMC4113340)
Supplement: NIHMS584359-supplement-04.pdf [file NIHMS584359-supplement-04.pdf]

| Table S2: Equations included in the systematic review |                                                                   |       |                                                                                                                                                                                                                                                                                                                                                                               |
|-------------------------------------------------------|-------------------------------------------------------------------|-------|-------------------------------------------------------------------------------------------------------------------------------------------------------------------------------------------------------------------------------------------------------------------------------------------------------------------------------------------------------------------------------|
| Equations                                             | Full name                                                         | Sex   | Sex specific equation ( if applicable)                                                                                                                                                                                                                                                                                                                                        |
| Edwards                                               |                                                                   | F     | $69.9 / Cr + 2.2$                                                                                                                                                                                                                                                                                                                                                             |
|                                                       |                                                                   | M     | $94.3 / Cr - 1.8$                                                                                                                                                                                                                                                                                                                                                             |
| CG                                                    | Cockcroft-Gault                                                   | F     | $1.73 \times [(140 - Age) \times [Wt / (72 \times Cr)] \times 0.85] / BSA$                                                                                                                                                                                                                                                                                                    |
|                                                       |                                                                   | M     | $1.73 \times [(140 - Age) \times [Wt / (72 \times Cr)] / BSA$                                                                                                                                                                                                                                                                                                                 |
| Rowe                                                  |                                                                   | M & F | $165.57 - 0.8 \times Age$                                                                                                                                                                                                                                                                                                                                                     |
| Mogensen                                              |                                                                   | M & F | $1.73 \times [ \{ 10000 / (Cr \times 88) - 14 \} / 0.9 ] / BSA$                                                                                                                                                                                                                                                                                                               |
| Robinson                                              |                                                                   | F     | $[2.11 - (0.007 \times Age) - 14.638 \times \{(Cr \times 88) / 1000\} + 0.0166 \times Wt] - 0.329 ] \times 60$                                                                                                                                                                                                                                                                |
|                                                       |                                                                   | M     | $[2.11 - (0.007 \times Age) - 14.638 \times \{(Cr \times 88) / 1000\} + 0.0166 \times Wt] \times 60$                                                                                                                                                                                                                                                                          |
| Walser                                                |                                                                   | F     | $1.73 \times [\{6.06 / (Cr \times 0.088)\} - (0.08 \times Age) + (0.096 \times Wt) - 4.81] \times [\{Ht/100\}^2 / 3] / BSA$                                                                                                                                                                                                                                                   |
|                                                       |                                                                   | M     | $1.73 \times [\{7.57 / (Cr \times 0.088)\} - (0.103 \times Age) + (0.096 \times Wt) - 6.66] \times [\{Ht/100\}^2 / 3] / BSA$                                                                                                                                                                                                                                                  |
| MDRD                                                  | Modification of Diet in Renal Disease Study Equation – 4 variable | F     | $175 \times Cr^{-1.154} \times Age^{-0.203} \times 0.742 \text{ if black} \times 1.212$                                                                                                                                                                                                                                                                                       |
|                                                       |                                                                   | M     | $175 \times Cr^{-1.154} \times Age^{-0.203} \text{ if black} \times 1.212$                                                                                                                                                                                                                                                                                                    |
| Nankivell                                             |                                                                   | F     | $1.73 \times [\{6.7 / (Cr \times 0.0884)\} + \{Wt / 4\} - \{Sun / 3.57\} - \{ 100 / (Ht / 100)^2 \} + 25 ] / BSA$                                                                                                                                                                                                                                                             |
|                                                       |                                                                   | M     | $1.73 \times [\{6.7 / (Cr \times 0.0884)\} + \{Wt / 4\} - \{Sun / 3.57\} - \{ 100 / (Ht / 100)^2 \} + 35 ] / BSA$                                                                                                                                                                                                                                                             |
| CKD-EPI                                               | Chronic Kidney Disease Epidemiology creatinine equation           |       | $141 \times \min(Cr/\kappa, 1)^\alpha \times \max(Scr/\kappa, 1)^{-1.209} \times 0.993^{Age} \times 1.018 \text{ [if female]} \times 1.159 \text{ [if black]}$ , where $\kappa$ is 0.7 for females and 0.9 for males, $\alpha$ is -0.329 for females and -0.411 for males, min indicates the minimum of $Scr/\kappa$ or 1, and max indicates the maximum of $Scr/\kappa$ or 1 |
| Gates                                                 |                                                                   | F     | $1.73 \times [60 \times \{ Cr^{-1.2} \} + \{56 - Age\} \times 0.3 \times \{ Cr^{-1.1} \}] / BSA$                                                                                                                                                                                                                                                                              |
|                                                       |                                                                   | M     | $1.73 \times [89.4 \times \{ Cr^{-1.2} \} + \{55 - Age\} \times 0.447 \times \{ Cr^{-1.1} \}] / BSA$                                                                                                                                                                                                                                                                          |
| Kaji                                                  |                                                                   | M & F | $1.73 \times [ 45 / Cr ]$                                                                                                                                                                                                                                                                                                                                                     |
| Nix-J                                                 | Nix Equation – for Creatinine measured by Jaffe reaction          | F     | $1.73 \times [ \{ (80 \times 0.661) / Cr \} \times \{ Wt / 70 \}^{0.75} ] / BSA$                                                                                                                                                                                                                                                                                              |
|                                                       |                                                                   | M     | $1.73 \times [ \{ 80 / Cr \} \times \{ Wt / 70 \}^{0.75} / BSA$                                                                                                                                                                                                                                                                                                               |
| Mayo                                                  |                                                                   | F     | $EXP [1.911 + \{ 5.249 / Cr \} - \{ 2.114 / Cr^2 \} - 0.00686 \times Age - 0.205]$                                                                                                                                                                                                                                                                                            |
|                                                       |                                                                   | M     | $EXP [1.911 + \{ 5.249 / Cr \} - \{ 2.114 / Cr^2 \} -$                                                                                                                                                                                                                                                                                                                        |

| Table S2: Equations included in the systematic review |                                                                                   |       |                                                                                                                                                               |
|-------------------------------------------------------|-----------------------------------------------------------------------------------|-------|---------------------------------------------------------------------------------------------------------------------------------------------------------------|
| Equations                                             | Full name                                                                         | Sex   | Sex specific equation ( if applicable)                                                                                                                        |
|                                                       |                                                                                   |       | $0.00686 \times \text{Age}$                                                                                                                                   |
| Yukawa                                                |                                                                                   | M & F | $1.73 \times [ \{ (470 - \text{Age}) \times \text{Wt} \} / (288 \times \text{Cr} + 98.7) ] / \text{BSA}$                                                      |
| CHUQ                                                  | Centre Hospitalier Universitaire de Québec equation                               | F     | $\text{EXP}[ \{ 10 - 1.16 \times (\log(\text{Cr} \times 88)) \} - 0.000084 \times \text{Age}^2 - 0.319]$                                                      |
|                                                       |                                                                                   | M     | $\text{EXP}[ \{ 10 - 1.16 \times (\log(\text{Cr} \times 88)) \} - 0.000084 \times \text{Age}^2]$                                                              |
| Matsuo                                                |                                                                                   | F     | $194 \times \text{Cr}^{-1.094} \times \text{Age}^{-0.287} \times 0.739$                                                                                       |
|                                                       |                                                                                   | M     | $194 \times \text{Cr}^{-1.094} \times \text{Age}^{-0.287}$                                                                                                    |
| BaracsKay                                             |                                                                                   | M & F | $1.73 \times [0.5 \times [ \{ 100 / \text{Cr} \} + 88 - \text{Age} ] / \text{BSA}$                                                                            |
| BIS_1                                                 | Berlin Initiative Study (BIS) equation                                            | F     | $3736 \times \text{Cr}^{-0.87} \times \text{Age}^{-0.95} \times 0.82$                                                                                         |
|                                                       |                                                                                   | M     | $3736 \times \text{Cr}^{-0.87} \times \text{Age}^{-0.95}$                                                                                                     |
| Wright                                                |                                                                                   | F     | $1.73 \times [ \{ (6580 - 38.8 \times \text{Age}) \times \text{BSA} * 0.832 \} / \{ \text{Cr} \times 88 \} ] / \text{BSA}$                                    |
|                                                       |                                                                                   | M     | $1.73 \times [ \{ (6580 - 38.8 \times \text{Age}) \times \text{BSA} \} / \{ \text{Cr} \times 88 \} ] / \text{BSA}$                                            |
| Martin                                                |                                                                                   | F     | $1.73 \times [ \{ 163 \times \text{Wt} \} \times \{ 1 - 0.15 \} / \{ 0.814 \times (\text{Cr} \times 88) \} ] / \text{BSA}$                                    |
|                                                       |                                                                                   | M     | $1.73 \times [ \{ 163 \times \text{Wt} \} / \{ 0.814 \times (\text{Cr} \times 88) \} ] / \text{BSA}$                                                          |
| Virga                                                 |                                                                                   | F     | $1.73 \times [ \{ 57.3 - 0.37 \times \text{Age} \} + \{ 0.51 \times \text{Wt} \} / \{ \text{Cr} - 2.9 \} ] / \text{BSA}$                                      |
|                                                       |                                                                                   | M     | $1.73 \times [ \{ 69.4 - 0.59 \times \text{Age} \} + \{ 0.79 \times \text{Wt} \} / \{ \text{Cr} - 3 \} ] / \text{BSA}$                                        |
| Nankivell-SPK                                         | Nankivell equation for simultaneous pancreas and kidney transplant recipients     | F     | $1.73 \times [ 50.4 + \{ 5520 / (\text{Cr} \times 88) \} + \{ 0.27 \times \text{Wt} \} - \{ 0.50 \times \text{Age} \} - 0.29 \times \text{Ht} ] / \text{BSA}$ |
|                                                       |                                                                                   | M     | $1.73 \times [ 71.4 + \{ 5520 / (\text{Cr} \times 88) \} + \{ 0.27 \times \text{Wt} \} - \{ 0.50 \times \text{Age} \} - 0.29 \times \text{Ht} ] / \text{BSA}$ |
| Taylor                                                |                                                                                   | M & F | $-200.85 + \{ 94.16 / \text{Cr} \} + \{ 0.14 \times \text{Wt} \} + \{ 1.33 \times \text{Ht} \} - \{ 0.75 \times \text{Age} \}$                                |
| AASK-pilot                                            | African-American Study of Kidney Disease- Equation developed from pilot data      | F     | $-0.29 \times \{ \text{Age} - 52 \} + \{ 88 / \text{Cr} \} - 0.77 \times \{ \text{BMI} - 30 \}$                                                               |
|                                                       |                                                                                   | M     | $0.30 \times \{ \text{Age} - 52 \} + \{ 105 / \text{Cr} \} + \{ \text{Wt} - 86 \}$                                                                            |
| AASK-main                                             | African-American Study of Kidney Disease- Equation developed from main study data | F     | $329 \times \text{Cr}^{-1.096} \times \text{Age}^{-0.294} \times 0.736$                                                                                       |
|                                                       |                                                                                   | M     | $329 \times \text{Cr}^{-1.096} \times \text{Age}^{-0.294}$                                                                                                    |
| Nix-HPLC                                              | Nix Equation – for Creatinine measured by high precision liquid chromatography    | F     | $1.73 \times [ \{ (74.3 \times 0.619) / \text{Cr} \} \times \{ \text{Wt} / 70 \}^{0.75} ] / \text{BSA}$                                                       |
|                                                       |                                                                                   | M     | $1.73 \times [ \{ 74.3 / \text{Cr} \} \times \{ \text{Wt} / 70 \}^{0.75} ] / \text{BSA}$                                                                      |

F; Female, M; Male, Cr; serum creatinine (mg/dl), Age; Age (years), Ht; Height (cm), Wt; Weight (kg); SUN. Serum Urea Nitrogen (mg/dl). BSA; Body Surface Area (m<sup>2</sup>) calculated using DuBois and DuBois formula [BSA = (W<sup>0.425</sup> x H<sup>0.725</sup>) x 0.007184]. All equations are expressed to report GFR scaled to 1.73 m<sup>2</sup>
