# Supplementary material
Source: PubMed Central journal article supplement (PMC4113340)
Supplement: NIHMS584359-supplement-05.pdf [file NIHMS584359-supplement-05.pdf]

| <b>Table S3: Clinical and demographic variables of the study population by transplanted organ</b>                                                                                                                                              |              |              |              |             |             |                 |
|------------------------------------------------------------------------------------------------------------------------------------------------------------------------------------------------------------------------------------------------|--------------|--------------|--------------|-------------|-------------|-----------------|
|                                                                                                                                                                                                                                                | Kidney       | Liver        | Lung         | Heart       | Pancreas    | Multiple organs |
| n (Row %)                                                                                                                                                                                                                                      | 1905 (52.6)  | 1251 (34.5)  | 110 (3.0)    | 147 (4.1)   | 26 (0.7)    | 183 (5.1)       |
| Age (years)                                                                                                                                                                                                                                    | 53.1 (13.8)  | 55.8 (11.7)  | 50.8 (11.2)  | 55.3 (13.9) | 48.3 (9.3)  | 52.3 (11.9)     |
| Female n(%)                                                                                                                                                                                                                                    | 800 (42.0)   | 549 (43.9)   | 54 (49.1)    | 40 (27.2)   | 14 (53.8)   | 84 (45.9)       |
| Black n (%)                                                                                                                                                                                                                                    | 20 (20.0)    | 50 (50.0)    | 1 (1.0)      | 1 (1.0)     | 0 (0.0)     | 0 (0.0)         |
| Diabetes n (%)                                                                                                                                                                                                                                 | 349 (18.3)   | 294 (23.5)   | 22 (20.0)    | 26 (17.7)   | 2 (7.7)     | 40 (21.9)       |
| Height (cm)                                                                                                                                                                                                                                    | 172.4 (10.3) | 171.6 (10.7) | 171.9 (10.1) | 173.8 (9.6) | 170.4 (9.4) | 171.8 (9.5)     |
| Weight (kg)                                                                                                                                                                                                                                    | 84.5 (19.8)  | 83.6 (20.5)  | 73.8 (16.2)  | 84.7 (21.4) | 77.6 (15.7) | 83.1 (22.0)     |
| BSA (m <sup>2</sup> )                                                                                                                                                                                                                          | 1.97 (0.24)  | 1.96 (0.26)  | 1.86 (0.22)  | 1.98 (0.26) | 1.89 (0.19) | 1.95 (0.26)     |
| BMI (kg/m <sup>2</sup> )                                                                                                                                                                                                                       | 28.3 (5.9)   | 28.3 (5.9)   | 25.0 (5.4)   | 27.9 (6.0)  | 26.9 (5.8)  | 28.1 (6.8)      |
| SCr (mg/dl)                                                                                                                                                                                                                                    | 1.52 (0.63)  | 1.44 (0.65)  | 1.59 (0.66)  | 1.45 (0.51) | 1.39 (0.56) | 1.56 (0.69)     |
| SUN * (mg/dl)                                                                                                                                                                                                                                  | 30.8 (21.6)  | 28.1 (14.4)  | 28.8 (10.7)  | 27.2 (12.0) | 26.9 (10.8) | 30.1 (15.0)     |
| GFR (ml/min/1.73m <sup>2</sup> )                                                                                                                                                                                                               | 53.5 (20.1)  | 57.4 (25.7)  | 55.5 (23.4)  | 59.1 (24.9) | 67.5 (30.7) | 49.9 (20.1)     |
| Study n(%)                                                                                                                                                                                                                                     |              |              |              |             |             |                 |
| Mayo                                                                                                                                                                                                                                           | 1027 (53.9)  | 520 (41.6)   | 33 (30.0)    | 147 (100.0) | 26 (100.0)  | 171 (93.4)      |
| Groningen                                                                                                                                                                                                                                      | 869 (45.6)   | 0 (0.0)      | 74 (67.3)    | 0 (0.0)     | 0 (0.0)     | 10 (5.5)        |
| Baylor                                                                                                                                                                                                                                         | 0 (0.0)      | 686 (54.8)   | 0 (0.0)      | 0 (0.0)     | 0 (0.0)     | 0 (0.0)         |
| Lund                                                                                                                                                                                                                                           | 0 (0.0)      | 44 (3.5)     | 0 (0.0)      | 0 (0.0)     | 0 (0.0)     | 0 (0.0)         |
| CCFP                                                                                                                                                                                                                                           | 9 (0.5)      | 1 (0.1)      | 3 (2.7)      | 0 (0.0)     | 0 (0.0)     | 2 (1.1)         |
| Marker n(%)                                                                                                                                                                                                                                    |              |              |              |             |             |                 |
| Iohexol                                                                                                                                                                                                                                        | 0 (0.0)      | 44 (3.5)     | 0 (0.0)      | 0 (0.0)     | 0 (0.0)     | 0 (0.0)         |
| Iothalamate                                                                                                                                                                                                                                    | 1905 (100.0) | 1207 (96.5)  | 110 (100.0)  | 147 (100.0) | 26 (100.0)  | 183 (100.0)     |
| Data presented as Mean (SD) or n (column %) as appropriate unless mentioned otherwise. Multiple organs category represents patients with more than 1 transplant (Heart/Kidney, Heart/Liver, Heart/Lung, Kidney/Liver, Kidney/Lung, Liver/Lung) |              |              |              |             |             |                 |
| *SUN missing on 764 patients (kidney=245, liver=456, lungs=4, heart= 13, pancreas= 5, and multiple organ transplant recipients=41)                                                                                                             |              |              |              |             |             |                 |
