# Supplementary material
Source: PubMed Central journal article supplement (PMC4113340)
Supplement: NIHMS584359-supplement-06.pdf [file NIHMS584359-supplement-06.pdf]

| <b>Table S4: Clinical and demographic variables of the patients by presence of serum urea nitrogen (SUN) variable</b>                            |              |              |
|--------------------------------------------------------------------------------------------------------------------------------------------------|--------------|--------------|
|                                                                                                                                                  | SUN          | No SUN       |
| n (Row %)                                                                                                                                        | 2858 (78.9)  | 764 (21.1)   |
| Age (years)                                                                                                                                      | 53.1 (13.2)  | 57.3 (11.9)  |
| Female n (%)                                                                                                                                     | 1225 (42.9)  | 316 (41.4)   |
| Black n (%)                                                                                                                                      | 62 (2.2)     | 10 (1.3)     |
| Height (cm)                                                                                                                                      | 172.2 (10.3) | 171.7 (10.7) |
| Weight (kg)                                                                                                                                      | 83.4 (19.8)  | 85.1 (21.4)  |
| BSA (m <sup>2</sup> )                                                                                                                            | 1.96 (0.25)  | 1.97 (0.27)  |
| BMI (kg/m <sup>2</sup> )                                                                                                                         | 28.0 (5.9)   | 28.7 (6.1)   |
| SCr (mg/dl)                                                                                                                                      | 1.52 (0.66)  | 1.38 (0.54)  |
| GFR (ml/min/1.73 m <sup>2</sup> )                                                                                                                | 54.9 (23.0)  | 55.6 (21.4)  |
| Diabetes n (%)                                                                                                                                   | 563 (19.7)   | 170 (22.3)   |
| Study n (%)                                                                                                                                      |              |              |
| Mayo                                                                                                                                             | 1164 (40.8)  | 760 (99.4)   |
| Groningen                                                                                                                                        | 953 (33.3)   | 0 (0.0)      |
| Baylor                                                                                                                                           | 686 (24.0)   | 0 (0.0)      |
| Lund                                                                                                                                             | 43 (1.5)     | 1(0.1)       |
| CCFP                                                                                                                                             | 12 (0.4)     | 3 (0.4)      |
| Organ n(%)                                                                                                                                       |              |              |
| Kidney                                                                                                                                           | 1660 (58.1)  | 245 (32.1)   |
| Liver                                                                                                                                            | 795 (27.8)   | 456 (59.7)   |
| Heart                                                                                                                                            | 134 (4.7)    | 13 (1.7)     |
| Lung                                                                                                                                             | 106 (3.7)    | 4 (0.5)      |
| Pancreas                                                                                                                                         | 21 (0.7)     | 5 (0.7)      |
| Multiple Organs                                                                                                                                  | 142 (5.0)    | 41 (5.4)     |
| Marker n(%)                                                                                                                                      |              |              |
| Iothalamate                                                                                                                                      | 2816 (98.5)  | 762 (99.7)   |
| Iohexol                                                                                                                                          | 42 (1.5)     | 2 (0.3)      |
| Data shown as mean (SD) or n (column %) as appropriate. P values for all the comparisons between SUN and No SUN group were significant (p<0.001) |              |              |
