# Supplementary material
Source: PubMed Central journal article supplement (PMC4113340)
Supplement: NIHMS584359-supplement-07.pdf [file NIHMS584359-supplement-07.pdf]

| <b>Table S5: Performance metrics of the CKD-EPI and the MDRD Study equations by study</b>                                                                                                                                                                                                                                                                                                                                                                                                                                 |            |                      |                      |                      |                      |                        |
|---------------------------------------------------------------------------------------------------------------------------------------------------------------------------------------------------------------------------------------------------------------------------------------------------------------------------------------------------------------------------------------------------------------------------------------------------------------------------------------------------------------------------|------------|----------------------|----------------------|----------------------|----------------------|------------------------|
| Metric                                                                                                                                                                                                                                                                                                                                                                                                                                                                                                                    | Equation   | Mayo                 | Groningen            | Baylor               | Lund                 | CCFP                   |
| Mean Error<br>(ml/min/1.73 m <sup>2</sup> )                                                                                                                                                                                                                                                                                                                                                                                                                                                                               | CKD-EPI    | -1.1<br>(-1.9, -0.3) | 2.0<br>(1.0, 3.1)    | 2.8<br>(0.7, 4.9)    | -1.6<br>(-4.9, 1.6)  | -6.5<br>(-14.3, 1.4)   |
|                                                                                                                                                                                                                                                                                                                                                                                                                                                                                                                           | MDRD Study | 2.2<br>(1.4, 3.0)    | 6.0<br>(4.9, 7.0)    | 6.6<br>(4.5, 8.7)    | 1.6<br>(-1.6, 4.7)   | -2.2<br>(-9.0, 4.6)    |
| Median Percent Error (%)                                                                                                                                                                                                                                                                                                                                                                                                                                                                                                  | CKD-EPI    | -2.4<br>(-4.5, -0.8) | 3.9<br>(1.9, 5.9)    | 4.2<br>(2.0, 7.1)    | -3.6<br>(-10.6, 4.7) | -10.6<br>(-30.6, 18.5) |
|                                                                                                                                                                                                                                                                                                                                                                                                                                                                                                                           | MDRD Study | 3.6<br>(2.0, 5.6)    | 10.8<br>(8.9, 12.3)  | 9.9<br>(7.3, 12.7)   | 1.6<br>(-7.9, 6.2)   | -2.2<br>(-16.7, 26.0)  |
| Mean Percent Error (%)<br>(log scale)                                                                                                                                                                                                                                                                                                                                                                                                                                                                                     | CKD-EPI    | -3.5<br>(-5.1, -2.0) | 3.5<br>(1.6, 5.4)    | 2.6<br>(-1.1, 6.2)   | -4.4<br>(-12.4, 3.0) | -12.8<br>(-27.7, 0.4)  |
|                                                                                                                                                                                                                                                                                                                                                                                                                                                                                                                           | MDRD Study | 2.3<br>(0.8, 3.8)    | 10.4<br>(8.6, 12.1)  | 8.6<br>(5.2, 12.0)   | 2.2<br>(-5.4, 9.3)   | -5.5<br>(-19.1, 6.6)   |
| Mean Absolute Error<br>(ml/min/1.73 m <sup>2</sup> )                                                                                                                                                                                                                                                                                                                                                                                                                                                                      | CKD-EPI    | 10.2<br>(9.7, 10.8)  | 9.5<br>(8.8, 10.2)   | 13.5<br>(12.1, 14.8) | 6.3<br>(4.1, 8.5)    | 9.0<br>(2.4, 15.6)     |
|                                                                                                                                                                                                                                                                                                                                                                                                                                                                                                                           | MDRD Study | 10.3<br>(9.7, 10.8)  | 10.5<br>(9.7, 11.3)  | 14.2<br>(12.7, 15.6) | 5.8<br>(3.6, 8.1)    | 7.0<br>(2.0, 12.1)     |
| Median Absolute Percent Bias (%)                                                                                                                                                                                                                                                                                                                                                                                                                                                                                          | CKD-EPI    | 15.7<br>(14.5, 16.8) | 14.5<br>(12.8, 16.0) | 18.9<br>(16.4, 21.1) | 11.1<br>(4.0, 16.8)  | 16.5<br>(0.0, 23.7)    |
|                                                                                                                                                                                                                                                                                                                                                                                                                                                                                                                           | MDRD Study | 16.1<br>(15.0, 17.4) | 16.6<br>(15.0, 18.2) | 19.5<br>(17.1, 22.1) | 11.5<br>(8.4, 19.0)  | 13.6<br>(3.1, 24.9)    |
| Mean Absolute Percent Error (%) log scale                                                                                                                                                                                                                                                                                                                                                                                                                                                                                 | CKD-EPI    | 21.6<br>(20.4, 22.9) | 20.3<br>(18.8, 21.8) | 28.1<br>(25.2, 31.0) | 15.9<br>(10.3, 21.8) | 21.0<br>(12.1, 30.6)   |
|                                                                                                                                                                                                                                                                                                                                                                                                                                                                                                                           | MDRD Study | 22.0<br>(20.8, 23.3) | 23.0<br>(21.4, 24.6) | 29.9<br>(27.0, 32.9) | 15.2<br>(9.4, 21.3)  | 17.4<br>(9.7, 25.7)    |
| P <sub>30</sub><br>(%)                                                                                                                                                                                                                                                                                                                                                                                                                                                                                                    | CKD-EPI    | 79.4<br>(76.9, 81.7) | 81.2<br>(77.7, 84.3) | 73.6<br>(69.1, 77.7) | 90.9<br>(71.5, 97.5) | 66.7<br>(31.2, 89.8)   |
|                                                                                                                                                                                                                                                                                                                                                                                                                                                                                                                           | MDRD Study | 81.0<br>(78.6, 83.2) | 80.5<br>(77.0, 83.6) | 70.3<br>(65.6, 74.6) | 88.6<br>(69.1, 96.5) | 80.0<br>(40.6, 95.9)   |
| Point estimates (mean or median as appropriate for the distribution) and 99.6 % CIs for the equation performance metrics for the CKD-EPI and the MDRD Study equation in study based categories are shown.<br>Mayo; Mayo Clinic, Rochester, MN, US. Baylor; Baylor University Medical Center, Dallas, TX. Groningen; Groningen Institute for Kidney Diseases, Groningen, Netherlands. Lund; Division of Nephrology Lund University, Lund, Sweden. CCFP; Cleveland Clinic Foundation Prospective Cohort, Cleveland, OH, US. |            |                      |                      |                      |                      |                        |
