# Supplementary material
Source: PubMed Central journal article supplement (PMC4113340)
Supplement: NIHMS584359-supplement-08.pdf [file NIHMS584359-supplement-08.pdf]

**Table S6: Performance metrics of the CKD-EPI and the MDRD Study equations by transplanted organ**

| Metric                                               | Equation   | Kidneys              | Liver                | Lungs                | Heart                | Pancreas             | Multiple              |
|------------------------------------------------------|------------|----------------------|----------------------|----------------------|----------------------|----------------------|-----------------------|
| Mean Error<br>(ml/min/1.73 m <sup>2</sup> )          | CKD-EPI    | 0.3<br>(-0.5, 1.0)   | 0.6<br>(-0.7, 1.8)   | 3.3<br>(0.3, 6.2)    | 1.4<br>(-2.1, 4.8)   | 7.1<br>(0.2, 14.0)   | -2.0<br>(-4.6, 0.6)   |
|                                                      | MDRD Study | 3.9<br>(3.1, 4.6)    | 4.1<br>(2.8, 5.3)    | 6.1<br>(2.0, 10.2)   | 4.9<br>(1.4, 8.3)    | 12.6<br>(5.4, 19.9)  | 1.8<br>(-0.8, 4.3)    |
| Median Percent Error<br>(%)                          | CKD-EPI    | 0.8<br>(-0.7, 2.7)   | 0.6<br>(-1.2, 2.6)   | 4.7<br>(-5.4, 11.4)  | 4.1<br>(0.3, 11.8)   | 7.3<br>(-5.8, 25.0)  | -6.3<br>(-14.3, -0.1) |
|                                                      | MDRD Study | 7.2<br>(5.7, 8.5)    | 5.7<br>(3.3, 7.8)    | 12.6<br>(5.1, 20.1)  | 8.8<br>(4.6, 16.5)   | 16.3<br>(6.8, 32.5)  | 1.6<br>(-3.6, 8.5)    |
| Mean Percent Error (log scale)                       | CKD-EPI    | -0.6<br>(-2.0, 0.9)  | -0.7<br>(-2.9, 1.5)  | 7.2<br>(1.8, 12.3)   | 1.0<br>(-5.5, 7.2)   | 8.0<br>(-4.3, 18.9)  | -6.2<br>(-12.2, -0.6) |
|                                                      | MDRD Study | 5.9<br>(4.5, 7.3)    | 5.0<br>(2.9, 7.1)    | 13.1<br>(7.8, 18.2)  | 6.4<br>(0.2, 12.2)   | 16.0<br>(4.3, 26.3)  | 1.1<br>(-4.5, 6.4)    |
| Mean Absolute Error<br>(ml/min/1.73 m <sup>2</sup> ) | CKD-EPI    | 9.7<br>(9.2, 10.2)   | 11.8<br>(11.0, 12.7) | 9.9<br>(8.0, 11.7)   | 11.6<br>(9.2, 14.0)  | 11.7<br>(6.7, 16.7)  | 11.1<br>(9.5, 12.7)   |
|                                                      | MDRD Study | 10.1<br>(9.6, 10.6)  | 12.1<br>(11.2, 13.1) | 12.1<br>(8.9, 15.3)  | 12.3<br>(9.8, 14.8)  | 14.9<br>(9.0, 20.8)  | 10.5<br>(8.9, 12.1)   |
| Median Percent Absolute Error<br>(%)                 | CKD-EPI    | 14.9<br>(13.9, 15.9) | 16.7<br>(15.2, 18.5) | 18.3<br>(13.5, 23.6) | 15.7<br>(11.4, 19.6) | 17.0<br>(11.7, 25.4) | 19.4<br>(12.1, 22.0)  |
|                                                      | MDRD Study | 16.0<br>(14.9, 17.1) | 16.6<br>(15.1, 17.7) | 19.1<br>(13.2, 24.5) | 17.1<br>(12.9, 21.3) | 19.0<br>(8.8, 25.8)  | 19.9<br>(16.8, 24.3)  |
| Mean Absolute Percent Error (log<br>scale) %         | CKD-EPI    | 20.7<br>(19.6, 21.8) | 24.4<br>(22.6, 26.3) | 23.3<br>(17.7, 29.1) | 22.0<br>(17.9, 26.2) | 22.4<br>(12.5, 33.2) | 26.1<br>(21.9, 30.5)  |
|                                                      | MDRD Study | 22.1<br>(20.9, 23.2) | 25.3<br>(23.5, 27.2) | 24.9<br>(19.4, 30.8) | 25.7<br>(20.8, 30.9) | 28.6<br>(17.1, 41.2) | 25.5<br>(21.3, 29.9)  |
| P <sub>30</sub>                                      | CKD-EPI    | 80.9<br>(78.5, 83.2) | 76.7<br>(73.4, 79.6) | 80.0<br>(68.3, 88.1) | 81.6<br>(72.1, 88.4) | 88.5<br>(59.8, 97.5) | 68.3<br>(58.9, 76.4)  |
|                                                      | MDRD Study | 81.7<br>(79.3, 83.9) | 75.9<br>(72.7, 78.9) | 72.7<br>(60.5, 82.3) | 82.3<br>(72.8, 89.0) | 76.9<br>(49.1, 92.0) | 72.1<br>(62.8, 79.9)  |

Point estimates (mean or median as appropriate for the distribution) and 99.6 % CIs for the equation performance metrics for the CKD-EPI and the MDRD Study equation in transplant organ based categories are shown.
