# Supplementary material
Source: PubMed Central journal article supplement (PMC4113340)
Supplement: NIHMS584359-supplement-09.pdf [file NIHMS584359-supplement-09.pdf]

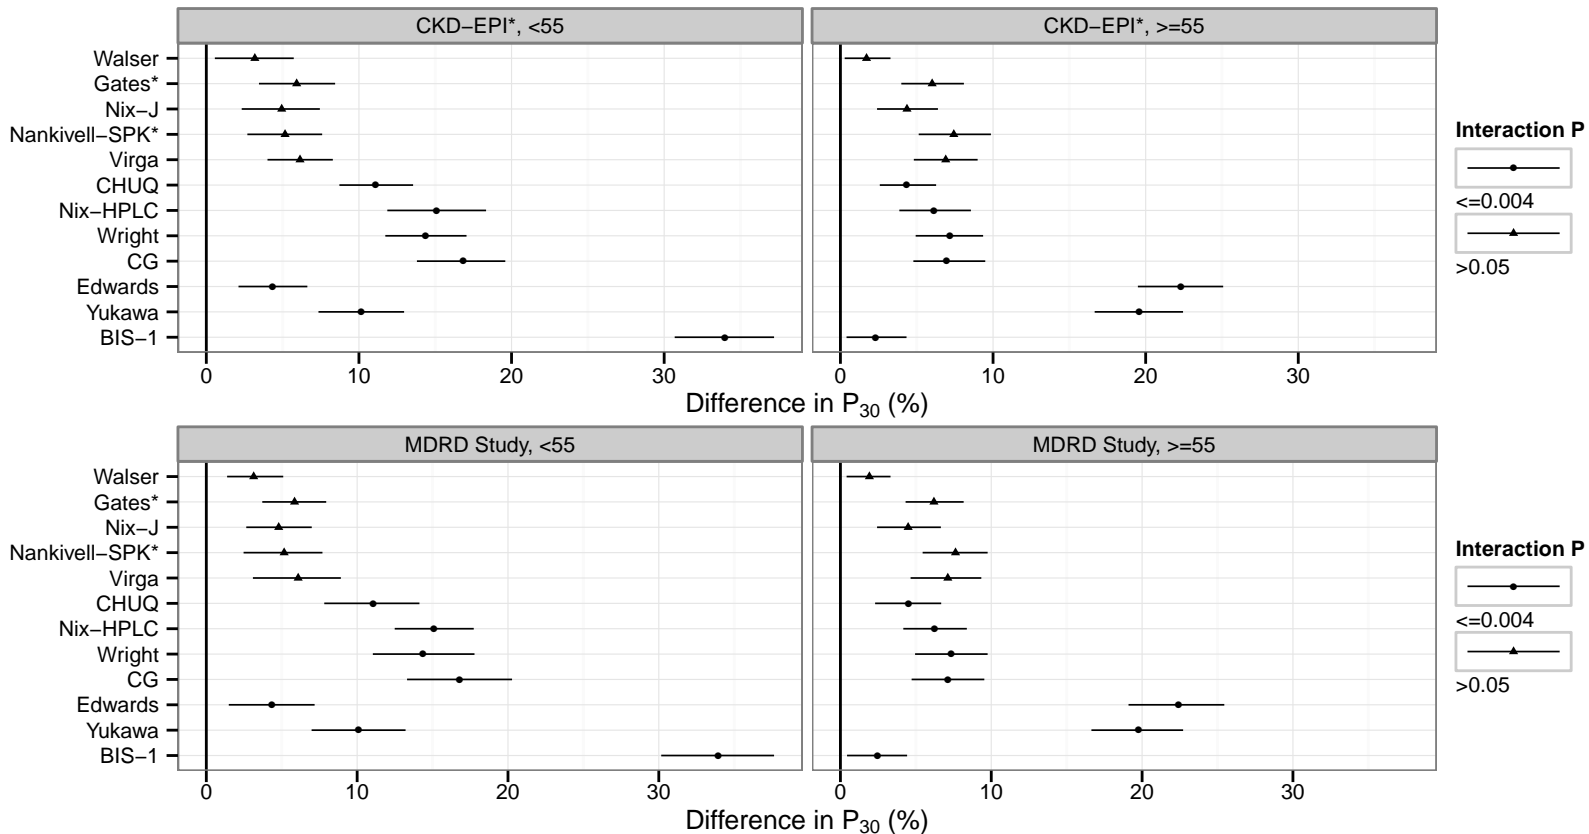

Figure S2: The difference between the  $P_{30}$  (99.6% CI) of the CKD-EPI or the MDRD Study equation and each of the alternative equations in subgroups of age (<55, >=55 years). A significant global p value ( $< 0.004$ ) indicates that the difference in the performance of the CKD-EPI (upper panels) or the MDRD Study equation (lower panels) and the alternative equations is different across the levels of sex. A difference of  $> 0$  indicates that the  $P_{30}$  of the alternative equation is less than the CKD-EPI or the MDRD Study equation. If the lower margin of the 99.6% CI is above 0, then the alternative equation is inferior; if the margins include 0, then the alternative equation is similar. Interaction P values represent 4 categories;  $P < 0.004$ ,  $P > 0.004-0.01$ ,  $P > 0.01-0.05$ , and  $P > 0.05$ . \*Equations that had transplant recipients in the development cohort.
