# Supplementary material
Source: PubMed Central journal article supplement (PMC4113340)
Supplement: NIHMS584359-supplement-11.pdf [file NIHMS584359-supplement-11.pdf]

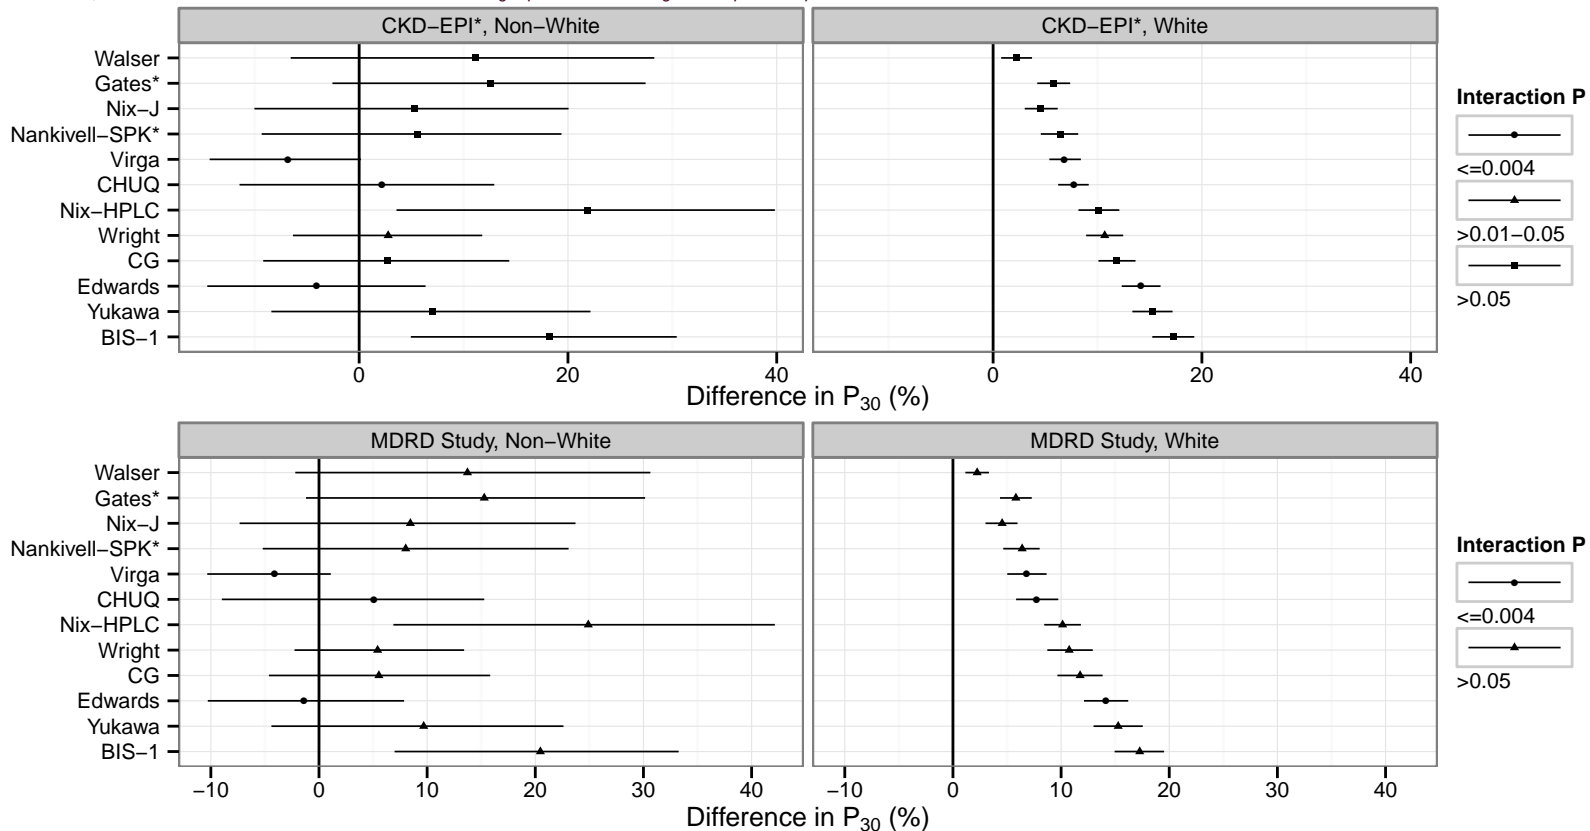

Figure S4: The difference between the P<sub>30</sub> (99.6% CI) of the CKD-EPI or the MDRD Study equation and each of the alternative equations in subgroups of race (non-white, white). A significant global p value (< 0.004) indicates that the difference in the performance of the CKD-EPI (upper panels) or the MDRD Study equation (lower panels) and the alternative equations is different across the levels of race. A difference of >0 indicates that the P<sub>30</sub> of the alternative equation is less than the CKD-EPI or the MDRD Study equation. If the lower margin of the 99.6% CI is above 0, then the alternative equation is inferior; if the margins include 0, then the alternative equation is similar. Interaction P values represent 4 categories; P < 0.004, P > 0.004–0.01, P > 0.01–0.05, and P > 0.05. \*Equations that had transplant recipients in the development cohort.
