# Supplementary material
Source: PubMed Central journal article supplement (PMC4113340)
Supplement: NIHMS584359-supplement-12.pdf [file NIHMS584359-supplement-12.pdf]

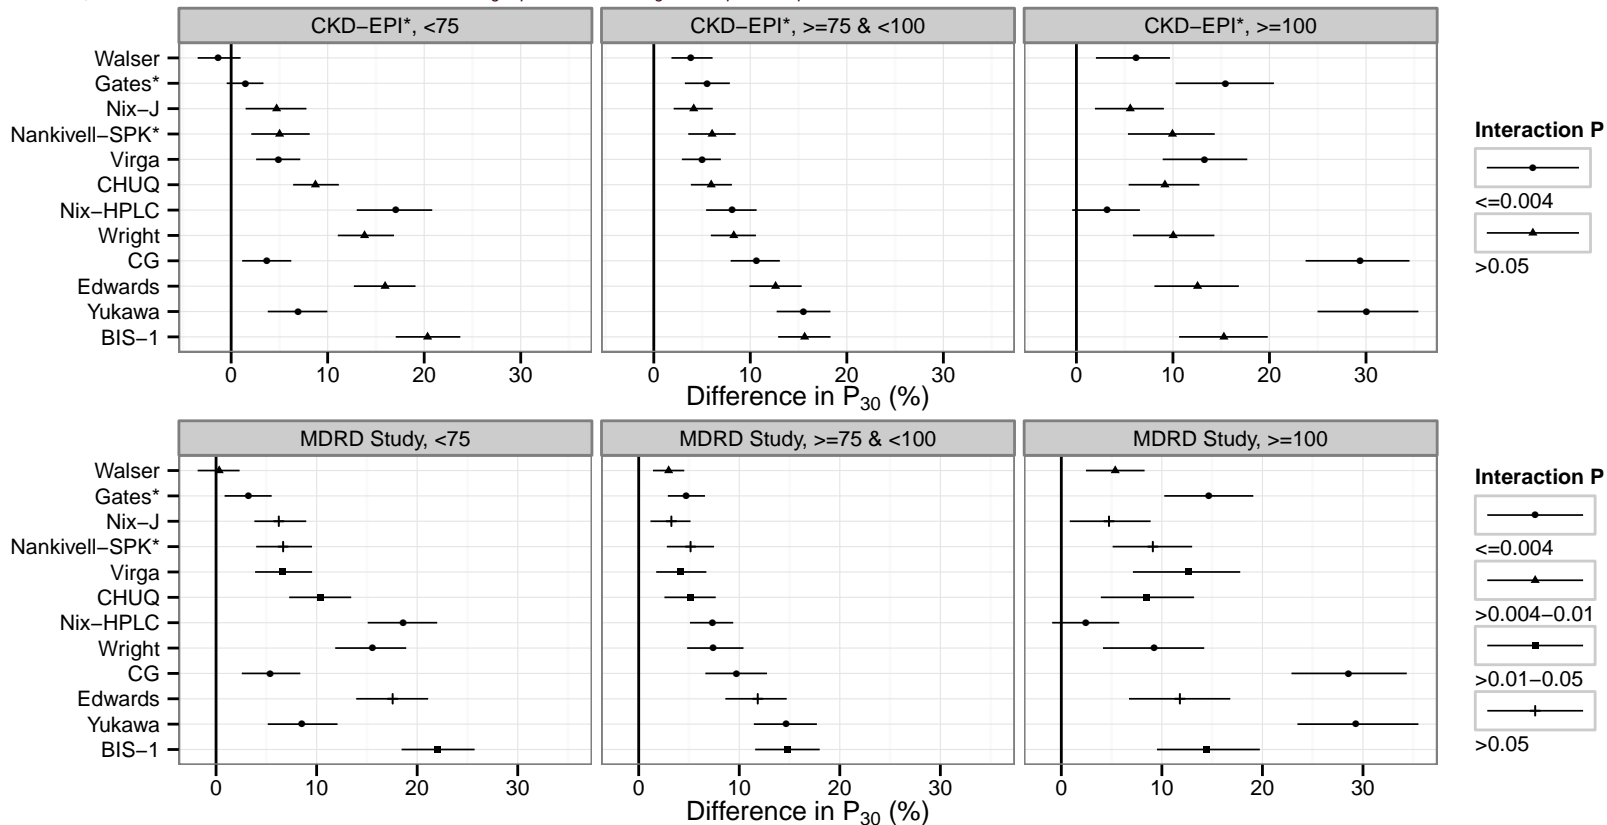

Figure S5: The difference between the P30 (99.6% CI) of the CKD-EPI or the MDRD Study equation and each of the alternative equations in subgroups of weight (<75, >75-<100, >100 kg). A significant global p value (< 0.004) indicates that the difference in the performance of the CKD-EPI (upper panels) or the MDRD Study equation (lower panels) and the alternative equations is different across the levels of weight. A difference of >0 indicates that the P30 of the alternative equation is less than the CKD-EPI or the MDRD Study equation. If the lower margin of the 99.6% CI is above 0, then the alternative equation is inferior; if the margins include 0, then the alternative equation is similar. Interaction P values represent 4 categories; P< 0.004, P>0.004-0.01, P>0.01-0.05, and P>0.05. \*Equations that had transplant recipients in the development cohort.
