# Supplementary material
Source: PubMed Central journal article supplement (PMC4113340)
Supplement: NIHMS584359-supplement-13.pdf [file NIHMS584359-supplement-13.pdf]

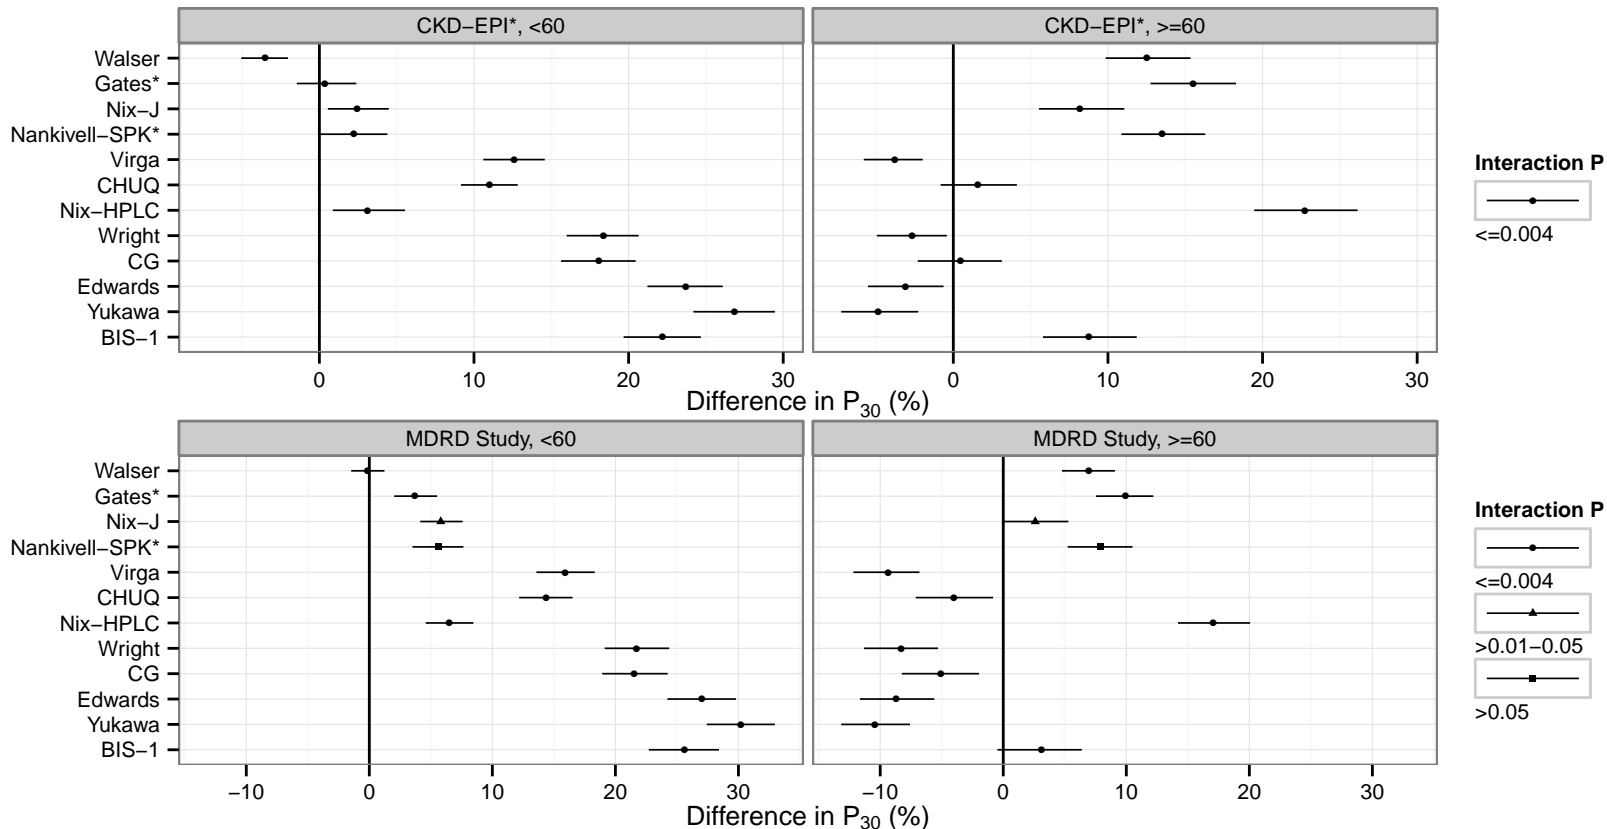

Figure S6. The difference between the P30 (99.6% CI) of the CKD-EPI or the MDRD Study equation and each of the alternative equations in subgroups based on level of mGFR (<60, >60 ml/min/1.73 m<sup>2</sup>). A significant global p value (< 0.004) indicates that the difference in the performance of the CKD-EPI (upper panels) or the MDRD Study equation (lower panels) and the alternative equations is different across the mGFR levels. A difference of >0 indicates that the P30 of the alternative equation is less than the CKD-EPI or the MDRD Study equation. If the lower margin of the 99.6% CI is above 0, then the alternative equation is inferior; if the margins include 0, then the alternative equation is similar; if the upper margin is below 0, then the alternative equation is superior. Interaction P values represent 4 categories; P<0.004, P>0.004-0.01, P>0.01-0.05, and P>0.05 \*Equations that had transplant recipients in the development cohort
