# Supplementary material
Source: PubMed Central journal article supplement (PMC4113340)
Supplement: NIHMS584359-supplement-15.pdf [file NIHMS584359-supplement-15.pdf]

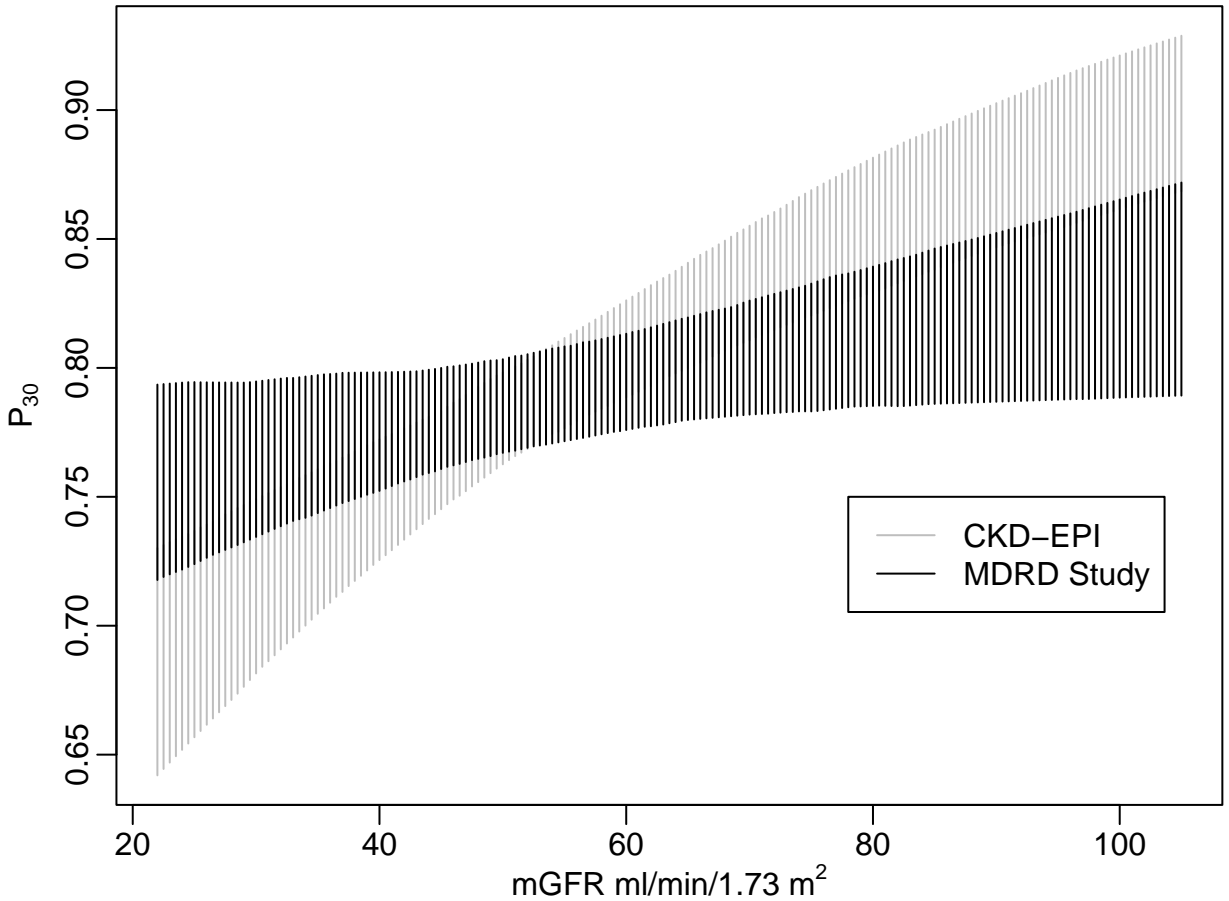

Figure S8: P<sub>30</sub> (99.6% CI) of the CKD-EPI and the MDRD Study equation across levels of measured GFR. Bars represent simulated (2000 simulations for each 1.0 ml/min/1.73 m<sup>2</sup>) confidence intervals of the P<sub>30</sub> of the CKD-EPI (grey) and the MDRD Study equation (black) plotted against measured GFR. Outliers were excluded by only including mGFR values lying in 2.5%-97.5% of the distribution.
