# Supplementary material
Source: PubMed Central journal article supplement (PMC4113340)

**Figure S1. Flow diagram of the subjects included in the study**

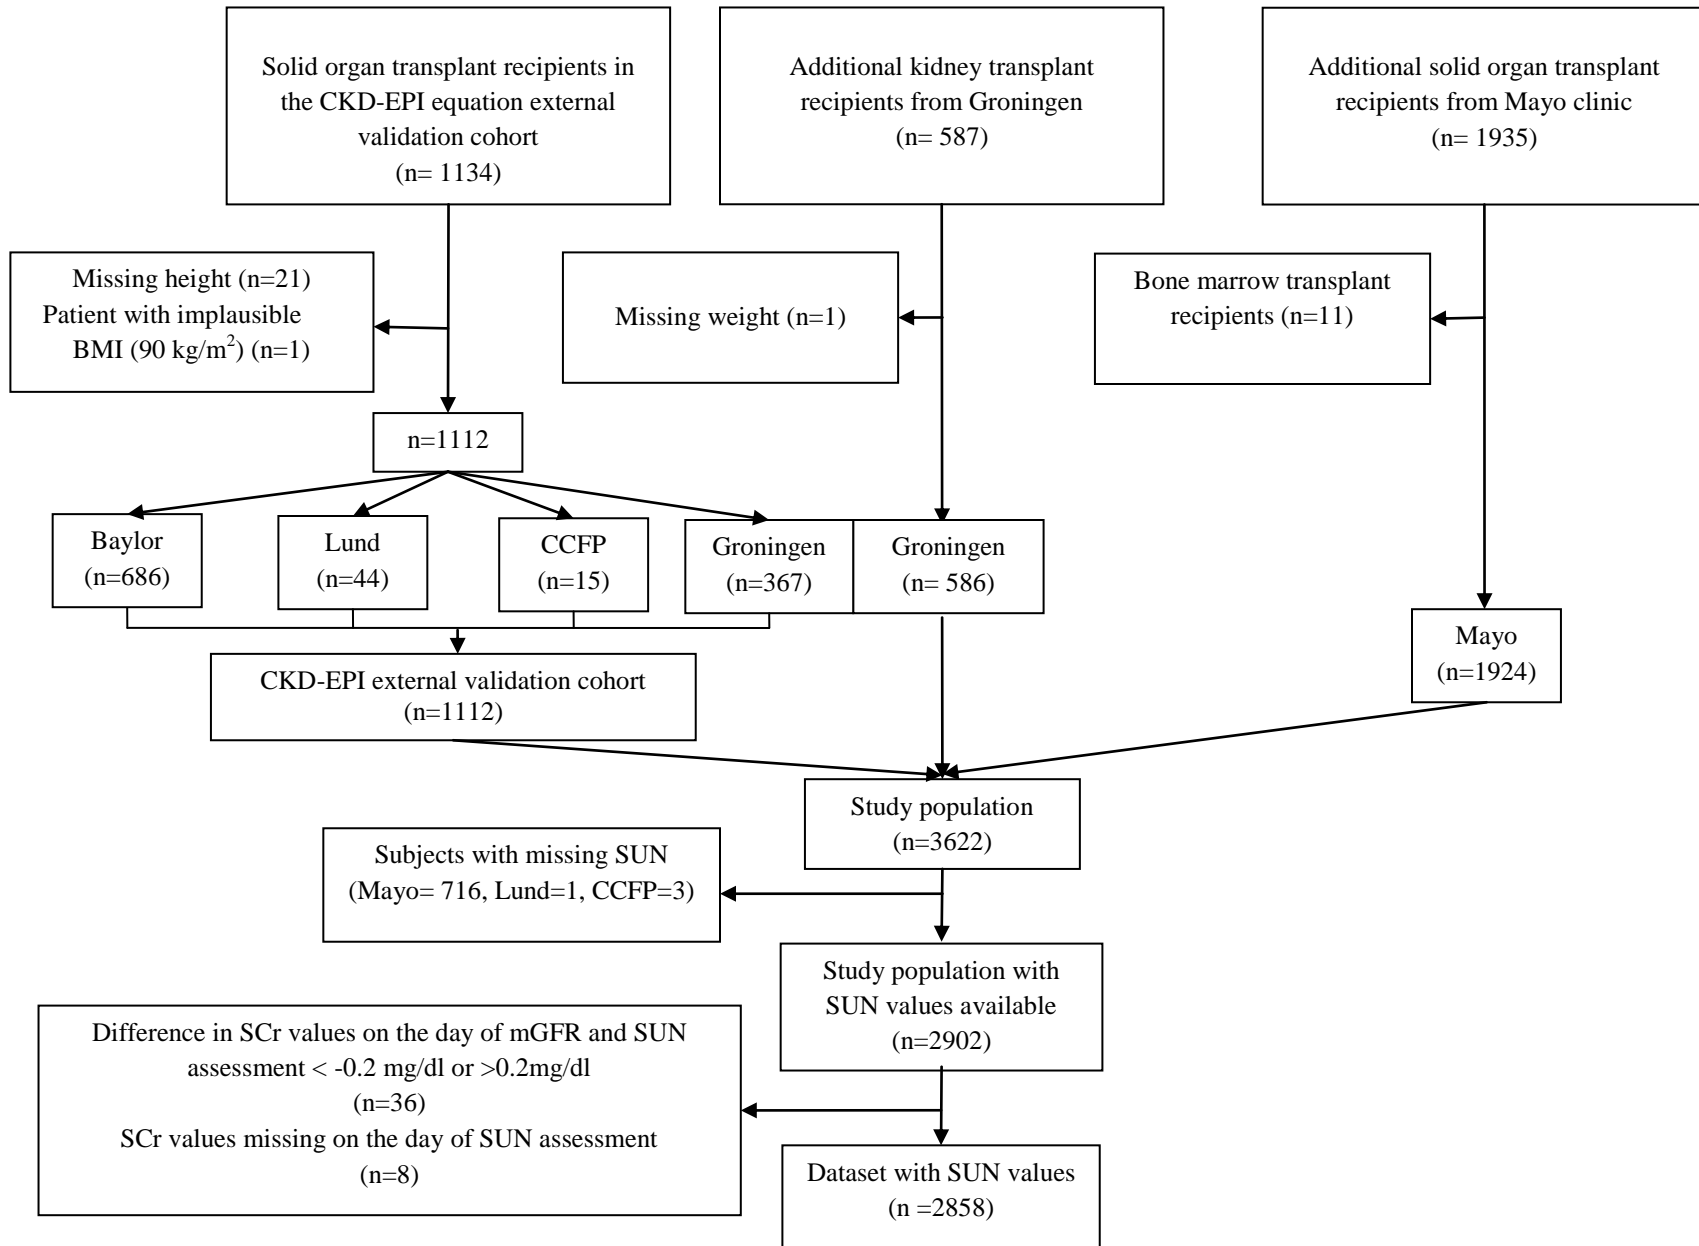

Supplement: NIHMS584359-supplement-01.pdf [file NIHMS584359-supplement-01.pdf]
